# Supplementary material for: Characterization of a novel eukaryal nick-sealing RNA ligase from Naegleria gruberi
Source: PubMed Central journal article supplement — RNA. 2015 May;21(5):824–32. doi: 10.1261/rna.049197.114 (PMC4408790; doi:10.1261/rna.049197.114), 2015-05
Supplement: supp_049197.114_SuppFigs1-2.pdf [file supp_049197.114_SuppFigs1-2.pdf]

## Supplemental Material

**Characterization of a novel eukaryal nick sealing RNA ligase from *Naegleria gruberi***

Mihaela-Carmen Unciuleac and Stewart Shuman

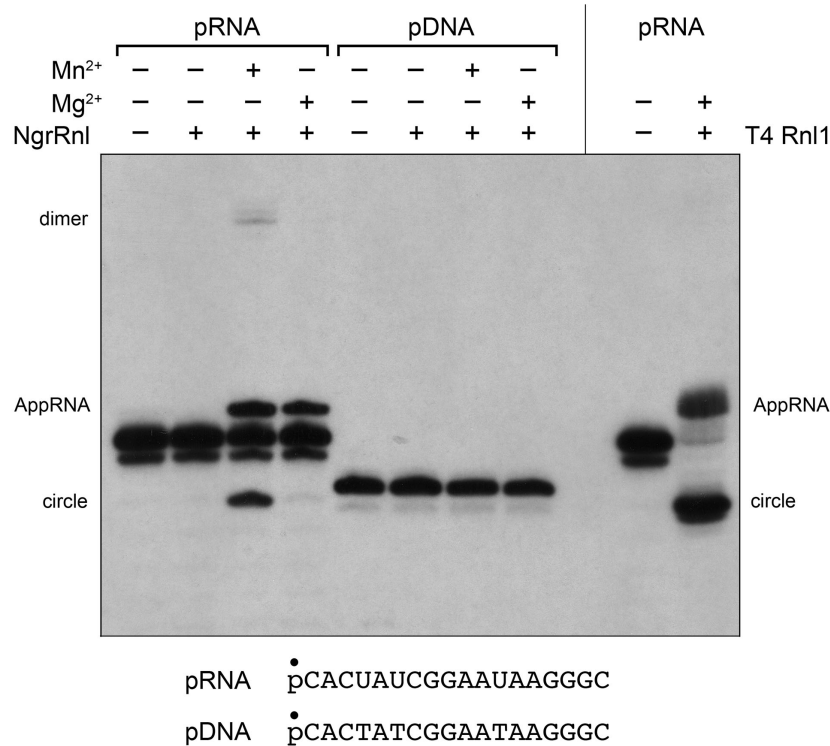

Figure S1. **Ligation of single-strand RNA.** NgrRnl ligation reaction mixtures (10  $\mu\text{l}$ ) containing 50 mM Tris-acetate (pH 6.0), 5 mM DTT, 0.2 mM ATP, 1 pmol (0.1  $\mu\text{M}$ ) <sup>32</sup>P-labeled 18-mer pRNA or pDNA as shown, 10 pmol (1  $\mu\text{M}$ ) NgrRnl (where indicated by +), and either no divalent cation (–) or 5 mM MnCl<sub>2</sub> or 5 mM MgCl<sub>2</sub> (+) were incubated for 30 min at 37°C. T4 Rnl1 ligation reaction mixtures (10  $\mu\text{l}$ ) containing 50 mM Tris-HCl (pH 7.5), 1mM DTT, 10 mM MgCl<sub>2</sub>, 0.2 mM ATP, 1 pmol (0.1  $\mu\text{M}$ ) <sup>32</sup>P-labeled 18-mer pRNA, and 10 units T4 Rnl1 (where indicated by +) were incubated for 30 min at 37°C. The products were analyzed by urea-PAGE (through a 40-cm gel) and visualized by autoradiography.

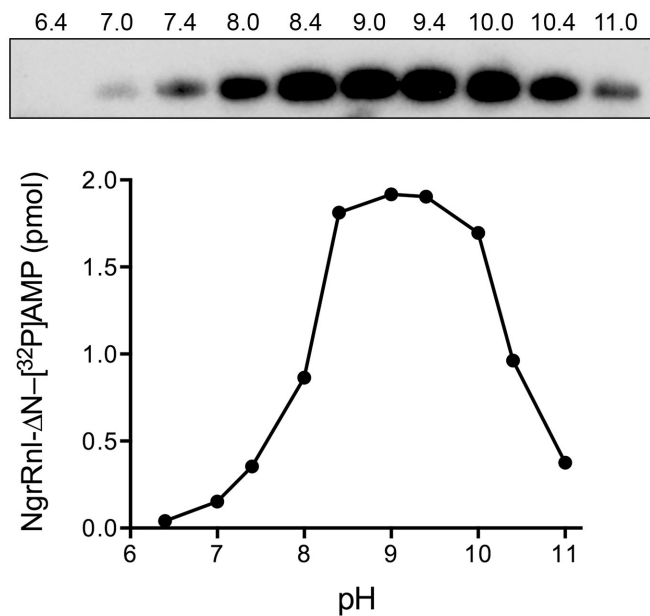

Figure S2. **pH profile for NgrRnl-ΔN adenylation.** Reaction mixtures (10  $\mu$ l) containing 50 mM buffer, either Tris-acetate (pH 6.4, 7.0), Tris-HCl (pH 7.4, 8.0, 8.4), 3-(cyclohexylamino)-2-hydroxypropanesulfonic acid (CAPSO; pH 9.0, 9.4), or 3-(cyclohexylamino)-1-propanesulfonic acid buffer (CAPS; pH 10, 10.4, 11.0), 5 mM MgCl<sub>2</sub>, 50  $\mu$ M [ $\alpha$ -<sup>32</sup>P]ATP, and 80 pmol NgrRnl-ΔN were incubated for 30 min at 37°C.
